# Supplementary material
Source: PubMed Central journal article supplement (PMC8906369)
Supplement: NIHMS1782282-supplement-1.pdf [file NIHMS1782282-supplement-1.pdf]

**TABLE 4 SUPPLEMENTARY TABLE 1 Odds** (Comment by Author: This table has results for 2017 data, which have not been discussed in text. I think it should be moved to supplementary material as Supplementary 4.&nbsp;More detail in cover letter.&nbsp;); **Ratios for Problem Status in 3 Analyses Comparing Substance Use Contrast Groups on Psychosocial Variables, for Groupings Based On Ever Use and 30-Day Use: 2017 YRBS Data**

| Psychosocial Risk-Protection Variable (Base Rate of Problem Status) | Substance Use Index and Type of Contrast |                              |                                       |                               |                              |                                       |
|---------------------------------------------------------------------|------------------------------------------|------------------------------|---------------------------------------|-------------------------------|------------------------------|---------------------------------------|
|                                                                     | Contrasts for Ever-Use Groups            |                              |                                       | Contrasts for 30 d Use Groups |                              |                                       |
|                                                                     | All Singles Versus All Duals             | All Duals Versus Triple User | All No Marijuana Versus All Marijuana | All Singles Versus All Duals  | All Duals Versus Triple User | All No Marijuana Versus All Marijuana |
| Fighting <sup>a</sup> (13%)                                         | 2.07 <sup>c</sup>                        | 1.71 <sup>c</sup>            | 2.09 <sup>c</sup>                     | 2.39 <sup>c</sup>             | 1.44 <sup>d</sup>            | 1.56 <sup>c</sup>                     |
| Weapon carrying (15%)                                               | 1.53 <sup>c</sup>                        | 1.54 <sup>c</sup>            | 0.91                                  | 1.74 <sup>c</sup>             | 2.54 <sup>c</sup>            | 0.95                                  |
| Weapon at school (4%)                                               | 1.96 <sup>e</sup>                        | 1.76 <sup>c</sup>            | 1.15                                  | 1.72 <sup>d</sup>             | 2.82 <sup>c</sup>            | 1.05                                  |
| Depression (32%)                                                    | 1.32 <sup>c</sup>                        | 1.46 <sup>c</sup>            | 1.38 <sup>c</sup>                     | 1.19                          | 1.72 <sup>c</sup>            | 1.27 <sup>e</sup>                     |
| Suicide ideation (18%)                                              | 1.52 <sup>c</sup>                        | 1.43 <sup>c</sup>            | 1.53 <sup>c</sup>                     | 1.27 <sup>f</sup>             | 1.68 <sup>c</sup>            | 1.54 <sup>c</sup>                     |

## Supplemental Materials

**Note:** The table layout displayed in 'Edit' view is not how it will appear in the printed/pdf version. This html display is to enable content corrections to the table. To preview the printed/pdf presentation of the table, please view the 'PDF' tab.

**SUPPLEMENTAL TABLE 7 Prevalence Estimates (weighted *N* and %) for 2017 Substance Use Variables and Groupings** (Comment by Author: I deleted two words because prevalence estimates for substance use groupings are now in a separate table (as Supplementary Table 7).&nbsp;+)

| <a href="#">AQ17</a>                    | <i>n</i> | %  |
|-----------------------------------------|----------|----|
| Ever used e-cigarettes                  |          |    |
| No                                      | 8171     | 58 |
| Yes                                     | 5973     | 42 |
| Missing                                 | 452      | —  |
| Used e-cigarettes past 30 d             |          |    |
| No                                      | 10 900   | 87 |
| Yes                                     | 1659     | 13 |
| Missing                                 | 1921     | —  |
| Ever smoked combustible cigarettes      |          |    |
| No                                      | 9851     | 71 |
| Yes                                     | 4009     | 29 |
| Missing                                 | 2853     | —  |
| Smoked combustible cigarettes past 30 d |          |    |
| No                                      | 13 129   | 91 |
| Yes                                     | 1269     | 9  |
| Missing                                 | 358      | —  |
| Ever used marijuana                     |          |    |

| AQ17                     | <i>n</i> | %  |
|--------------------------|----------|----|
| No                       | 9310     | 64 |
| Yes                      | 5139     | 36 |
| Missing                  | 483      | —  |
| Used marijuana past 30 d |          |    |
| No                       | 11 632   | 80 |
| Yes                      | 2872     | 20 |
| Missing                  | 379      | —  |

Analytic *n* does not always add to 14 765 because the weighting procedure can upweight or downweight cases. —, not applicable.

**Note:** The table layout displayed in ‘Edit’ view is not how it will appear in the printed/pdf version. This html display is to enable content corrections to the table. To preview the printed/pdf presentation of the table, please view the ‘PDF’ tab.

**SUPPLEMENTAL TABLE 78** Prevalence Estimates (Weighted N and %) for Substance Use Groupings, 2017 YRBS Data

| Group                                 | Ever Use |    | 30 Day Use |    |
|---------------------------------------|----------|----|------------|----|
|                                       | <i>n</i> | %  | <i>n</i>   | %  |
| Nonuser                               | 6235     | 47 | 9310       | 76 |
| E-cigarette only                      | 1201     | 9  | 394        | 3  |
| Cigarette only                        | 389      | 3  | 142        | 1  |
| Marijuana only                        | 667      | 5  | 975        | 8  |
| E-cigarette and cigarette             | 637      | 5  | 228        | 2  |
| E-cigarette and marijuana             | 1237     | 9  | 387        | 3  |
| Cigarette and marijuana               | 354      | 3  | 202        | 2  |
| E-cigarette, cigarette, and marijuana | 2424     | 18 | 549        | 5  |
| <i>N</i>                              | 13 145   | —  | 12 189     | —  |
| Missing                               | 3286     | —  | 2347       | —  |

Analytic *n* does not always add to 14 765 because the weighting procedure can upweight or downweight cases. —, not applicable.

**Note:** The table layout displayed in ‘Edit’ view is not how it will appear in the printed/pdf version. This

html display is to enable content corrections to the table. To preview the printed/pdf presentation of the table, please view the 'PDF' tab.

**SUPPLEMENTAL TABLE 9 Adjusted Mean (SE) on Psychosocial Variables and Composite Risk Score for Ever-Usage Groups: 2017 YRBS Data, with Pairwise Comparisons and *P* for Omnibus F Test** [AQ18](#)

| <a href="#">AQ19</a><br>Variable      | Ever-Usage Group                                                |                                                                                      |                                                                          |                                                                                |                                                                                                       |                                                                                                        |                                                                                                    |                                                                                                                       | <i>P</i> for F Test |
|---------------------------------------|-----------------------------------------------------------------|--------------------------------------------------------------------------------------|--------------------------------------------------------------------------|--------------------------------------------------------------------------------|-------------------------------------------------------------------------------------------------------|--------------------------------------------------------------------------------------------------------|----------------------------------------------------------------------------------------------------|-----------------------------------------------------------------------------------------------------------------------|---------------------|
|                                       | Nonuser<br>(Analytic<br><i>N</i> = 5011),<br>Adjusted<br>M (SE) | E-<br>cigarette<br>Only<br>(Analytic<br><i>N</i> = 894),<br>Adjusted<br>Mean<br>(SE) | Cigarette<br>Only<br>(Analytic<br><i>N</i> = 296),<br>Adjusted<br>M (SE) | Marijuana<br>Only<br>(Analytic<br><i>N</i> = 650),<br>Adjusted<br>Mean<br>(SE) | Dual E-<br>cigarette<br>and<br>Cigarette<br>(Analytic<br><i>N</i> = 448),<br>Adjusted<br>Mean<br>(SE) | Dual E-<br>cigarette<br>and<br>Marijuana<br>(Analytic<br><i>N</i> = 1017),<br>Adjusted<br>Mean<br>(SE) | Dual<br>Cigarette<br>and<br>Marijuana<br>(Analytic<br><i>N</i> = 326),<br>Adjusted<br>Mean<br>(SE) | E-<br>cigarette,<br>Cigarette,<br>and<br>Marijuana<br>(Analytic<br><i>N</i> = 17<br>331),<br>Adjusted<br>Mean<br>(SE) |                     |
| Aggressive<br>behavior                |                                                                 |                                                                                      |                                                                          |                                                                                |                                                                                                       |                                                                                                        |                                                                                                    |                                                                                                                       |                     |
| 12 mo<br>fighting<br>(1-8)            | 1.21 (.02)                                                      | 1.31 (.03)                                                                           | 1.46a<br>(.06)                                                           | 1.53a<br>(.04)                                                                 | 1.55a<br>(.05)                                                                                        | 1.66 (.03)                                                                                             | 1.98b<br>(.06)                                                                                     | 1.98b<br>(.03)                                                                                                        | <.0001              |
| 30 d<br>carry<br>weapon<br>(1-5)      | 1.21 (.01)                                                      | 1.37a<br>(.03)                                                                       | 1.49b<br>(.06)                                                           | 1.36a<br>(.04)                                                                 | 1.70c<br>(.05)                                                                                        | 1.42ab<br>(.03)                                                                                        | 1.64c<br>(.06)                                                                                     | 1.73 (.02)                                                                                                            | <.0001              |
| 30 d<br>weapon<br>school<br>(1-5)     | 1.05a<br>(.01)                                                  | 1.04a<br>(.02)                                                                       | 1.07ab<br>(.03)                                                          | 1.07ab<br>(.02)                                                                | 1.09ab<br>(.02)                                                                                       | 1.09ab<br>(.02)                                                                                        | 1.10abc<br>(.03)                                                                                   | 1.19c<br>(.01)                                                                                                        | <.0001              |
| Psychiatric<br>symptomatology         |                                                                 |                                                                                      |                                                                          |                                                                                |                                                                                                       |                                                                                                        |                                                                                                    |                                                                                                                       |                     |
| 12 mo<br>depressed<br>(1,2)           | 1.23 (.01)                                                      | 1.29 (.01)                                                                           | 1.36a<br>(.03)                                                           | 1.37ab<br>(.02)                                                                | 1.37ab<br>(.02)                                                                                       | 1.38ab<br>(.01)                                                                                        | 1.42 (.03)                                                                                         | 1.47 (.01)                                                                                                            | <.0001              |
| 12 mo<br>suicide<br>ideation<br>(1,2) | 1.12a<br>(.01)                                                  | 1.12a<br>(.01)                                                                       | 1.19b<br>(.02)                                                           | 1.19b<br>(.01)                                                                 | 1.20b<br>(.02)                                                                                        | 1.22b<br>(.01)                                                                                         | 1.25 (.02)                                                                                         | 1.28 (.01)                                                                                                            | <.0001              |
| Sexual<br>risk<br>behavior            |                                                                 |                                                                                      |                                                                          |                                                                                |                                                                                                       |                                                                                                        |                                                                                                    |                                                                                                                       |                     |
| Ever<br>had sex<br>(1,2)              | 1.19 (.01)                                                      | 1.38a<br>(.01)                                                                       | 1.37a<br>(.02)                                                           | 1.53b<br>(.02)                                                                 | 1.52b<br>(.02)                                                                                        | 1.62 (.01)                                                                                             | 1.66 (.02)                                                                                         | 1.73 (.01)                                                                                                            | <.0001              |

| AQ19 Variable               | Ever-Usage Group                             |                                                         |                                                    |                                                       |                                                                       |                                                                        |                                                                     |                                                                                | P for F Test |
|-----------------------------|----------------------------------------------|---------------------------------------------------------|----------------------------------------------------|-------------------------------------------------------|-----------------------------------------------------------------------|------------------------------------------------------------------------|---------------------------------------------------------------------|--------------------------------------------------------------------------------|--------------|
|                             | Nonuser (Analytic N = 5011), Adjusted M (SE) | E-cigarette Only (Analytic N = 894), Adjusted Mean (SE) | Cigarette Only (Analytic N = 296), Adjusted M (SE) | Marijuana Only (Analytic N = 650), Adjusted Mean (SE) | Dual E-cigarette and Cigarette (Analytic N = 448), Adjusted Mean (SE) | Dual E-cigarette and Marijuana (Analytic N = 1017), Adjusted Mean (SE) | Dual Cigarette and Marijuana (Analytic N = 326), Adjusted Mean (SE) | E-cigarette, Cigarette, and Marijuana (Analytic N = 17331), Adjusted Mean (SE) |              |
| Lifetime No. partners (1-7) | 1.36 (.02)                                   | 1.74a (.04)                                             | 1.81a (.08)                                        | 2.21 (.06)                                            | 2.04 (.06)                                                            | 2.52 (.04)                                                             | 2.97 (.08)                                                          | 3.20 (.03)                                                                     | <.0001       |
| Collateral substance use    |                                              |                                                         |                                                    |                                                       |                                                                       |                                                                        |                                                                     |                                                                                |              |
| Lifetime alcohol use (1-7)  | 1.61 (.02)                                   | 2.63a (.04)                                             | 2.71a (.08)                                        | 2.84 (.05)                                            | 3.27 (.06)                                                            | 3.42b (.04)                                                            | 3.49b (.07)                                                         | 4.51 (.03)                                                                     | <.0001       |
| 30 d alcohol use (1-7)      | 1.12 (.01)                                   | 1.45a (.03)                                             | 1.37a (.05)                                        | 1.53 (.04)                                            | 1.73 (.05)                                                            | 1.88b (.03)                                                            | 1.89b (.05)                                                         | 2.47 (.02)                                                                     | <.0001       |
| 30 d binge drink (1-7)      | 1.04 (.01)                                   | 1.16a (.03)                                             | 1.16a (.05)                                        | 1.22a (.03)                                           | 1.37b (.04)                                                           | 1.48b (.03)                                                            | 1.46b (.05)                                                         | 2.06 (.02)                                                                     | <.0001       |
| Illicit drug use            |                                              |                                                         |                                                    |                                                       |                                                                       |                                                                        |                                                                     |                                                                                |              |
| Inhalant use (1-6)          | 1.03 (.01)                                   | 1.09a (.02)                                             | 1.18ab (.03)                                       | 1.08a (.02)                                           | 1.11a (.02)                                                           | 1.12 (.02)                                                             | 1.22ab (.03)                                                        | 1.29 (.01)                                                                     | <.0001       |
| Prescription drug use (1-6) | 1.07a (.01)                                  | 1.11a (.03)                                             | 1.22b (.05)                                        | 1.25b (.03)                                           | 1.25b (.04)                                                           | 1.36 (.02)                                                             | 1.51 (.04)                                                          | 1.88 (.02)                                                                     | <.0001       |
| Protective Factors          |                                              |                                                         |                                                    |                                                       |                                                                       |                                                                        |                                                                     |                                                                                |              |
| Grades (1F-5A)              | 4.29 (.01)                                   | 4.13a (.03)                                             | 4.02b (.05)                                        | 4.07ab (.03)                                          | 3.93bc (.04)                                                          | 3.92c (.03)                                                            | 3.77d (.05)                                                         | 3.76d (.02)                                                                    | <.0001       |
| Wear seat belt in car (1-5) | 4.56 (.01)                                   | 4.36a (.03)                                             | 4.33ab (.05)                                       | 4.33a (.03)                                           | 4.18 (.04)                                                            | 4.27ab (.03)                                                           | 4.05 (.05)                                                          | 3.97 (.02)                                                                     | <.0001       |
| Composite risk score (0-14) | 1.07 (.03)                                   | 1.84 (.06)                                              | 2.26 (.11)                                         | 2.48 (.07)                                            | 2.80 (.09)                                                            | 3.20 (.06)                                                             | 3.77 (.10)                                                          | 4.84 (.05)                                                                     | <.0001       |

Adjusted for age, sex, and race and ethnicity. Analytic *n* represents the approximate midpoint from range of cell sizes over all variables. In pairwise comparisons (across rows), cells with common subscript superscript do not differ significantly (at  $P < .05$ ). Composite risk scores are based on 14 binary (0,1) indices indicating high-risk status for each row variable in table.

**Note:** The table layout displayed in 'Edit' view is not how it will appear in the printed/pdf version. This html display is to enable content corrections to the table. To preview the printed/pdf presentation of the table, please view the 'PDF' tab.

**SUPPLEMENTAL TABLE 10 Adjusted Mean (SE) on Psychosocial Variables and Composite Risk Scores for 30-Day Usage Groups: 2017 YRBS Data, With Pairwise Comparisons and P for Omnibus F Test**

| Variable                     | 30 d Usage Group Nonuser (7582) | E-cigarette Only (321) | Cigarette Only (120) | Marijuana Only (919) | Dual E-cigarette and Cigarette (162) | Dual E-cigarette and Marijuana (324) | Dual Cigarette and Marijuana (158) | E-cigarette, Cigarette, and Marijuana (404) | P for F Test |
|------------------------------|---------------------------------|------------------------|----------------------|----------------------|--------------------------------------|--------------------------------------|------------------------------------|---------------------------------------------|--------------|
| Aggressive behavior          |                                 |                        |                      |                      |                                      |                                      |                                    |                                             |              |
| 12 mo fighting (1-8)         | 1.28 (.01)                      | 1.59 (.06)             | 1.88a (.10)          | 1.73a (.03)          | 2.20b (.08)                          | 2.06ab (.06)                         | 2.32b (.08)                        | 2.65 (.05)                                  | <.0001       |
| 30 d carry weapon (1-5)      | 1.26 (.01)                      | 1.80a (.06)            | 2.06b (.10)          | 1.43 (.03)           | 2.24b (.08)                          | 1.69a (.06)                          | 1.79 (.08)                         | 2.11b (.05)                                 | <.0001       |
| 30 d weapon school (1-5)     | 1.05 (.01)                      | 1.16a (.03)            | 1.23ab (.05)         | 1.11 (.02)           | 1.32b (.04)                          | 1.18ac (.03)                         | 1.23b (.04)                        | 1.40 (.02)                                  | <.0001       |
| Psychiatric symptomatology   |                                 |                        |                      |                      |                                      |                                      |                                    |                                             |              |
| 12 mo depressed (1,2)        | 1.27 (.01)                      | 1.35a (.02)            | 1.46b (.04)          | 1.38a (.01)          | 1.39ab (.03)                         | 1.41ab (.02)                         | 1.53b (.03)                        | 1.54b (.02)                                 | <.0001       |
| 12 mo suicide ideation (1,2) | 1.14a (.01)                     | 1.16a (.02)            | 1.32b (.03)          | 1.22c (.01)          | 1.27bc (.03)                         | 1.22c (.02)                          | 1.36bd (.03)                       | 1.39d (.02)                                 | <.0001       |
| Sexual risk behavior         |                                 |                        |                      |                      |                                      |                                      |                                    |                                             |              |
| Ever had sex (1,2)           | 1.26 (.01)                      | 1.59a (.02)            | 1.64ab (.04)         | 1.64b (.01)          | 1.74c (.03)                          | 1.71c (.02)                          | 1.79cd (.03)                       | 1.81d (.02)                                 | <.0001       |
| Lifetime No. partners (1-7)  | 1.54 (.01)                      | 2.39 (.07)             | 2.98a (.12)          | 2.68 (.04)           | 2.96a (.10)                          | 3.08a (.07)                          | 3.60 (.10)                         | 3.86 (.06)                                  | <.0001       |

| Variable                             | 30 d Usage Group Nonuser (7582) | E-cigarette Only (321) | Cigarette Only (120) | Marijuana Only (919) | Dual E-cigarette and Cigarette (162) | Dual E-cigarette and Marijuana (324) | Dual Cigarette and Marijuana (158) | E-cigarette, Cigarette, and Marijuana (404) | P for F Test |
|--------------------------------------|---------------------------------|------------------------|----------------------|----------------------|--------------------------------------|--------------------------------------|------------------------------------|---------------------------------------------|--------------|
| Collateral alcohol use               |                                 |                        |                      |                      |                                      |                                      |                                    |                                             |              |
| Lifetime alcohol use (1–7)           | 1.98 (.02)                      | 3.75 (.07)             | 3.99 (.13)           | 3.46 (.05)           | 4.52a (.10)                          | 4.32a (.07)                          | 4.74 (.11)                         | 5.26 (.07)                                  | <.0001       |
| 30 d alcohol use (1–7)               | 1.19 (.01)                      | 2.06a (.04)            | 2.07a (.07)          | 1.85 (.03)           | 2.69b (.06)                          | 2.65b (.04)                          | 2.63b (.06)                        | 3.49 (.04)                                  | <.0001       |
| 30 d binge (1–7)                     | 1.07 (.01)                      | 1.54 (.04)             | 1.78 (.07)           | 1.45 (.02)           | 2.29a (.06)                          | 2.21a (.04)                          | 2.24a (.06)                        | 3.30 (.04)                                  | <.0001       |
| Illicit drug use                     |                                 |                        |                      |                      |                                      |                                      |                                    |                                             |              |
| Lifetime inhalant use (1–6)          | 1.07a (.01)                     | 1.15b (.03)            | 1.15b (.05)          | 1.10b (.02)          | 1.13ab (.04)                         | 1.20b (.03)                          | 1.32 (.04)                         | 1.62 (.03)                                  | <.0001       |
| Lifetime prescription drug use (1–6) | 1.12 (.01)                      | 1.25 (.04)             | 1.47a (.07)          | 1.43a (.02)          | 1.74b (.06)                          | 1.64b (.04)                          | 2.19 (.06)                         | 2.59 (.04)                                  | <.0001       |
| Protective factors                   |                                 |                        |                      |                      |                                      |                                      |                                    |                                             |              |
| Grades (1F–5A)                       | 4.22 (.01)                      | 3.91a (.05)            | 3.77a (.08)          | 3.92a (.03)          | 3.82ab (.07)                         | 3.74b (.05)                          | 3.52 (.07)                         | 3.64 (.04)                                  | <.0001       |
| Wear seat belt (1–5)                 | 4.48 (.01)                      | 4.11a (.05)            | 3.89ab (.08)         | 4.20 (.03)           | 3.84bc (.07)                         | 4.03a (.05)                          | 3.72c (.07)                        | 3.62 (.05)                                  | <.0001       |
| Composite risk score (0–14)          | 1.45 (.02)                      | 3.43a (.10)            | 4.48 (.17)           | 3.42a (.06)          | 5.00b (.14)                          | 4.92b (.10)                          | 5.78 (.14)                         | 6.92 (.09)                                  | <.0001       |

Adjusted for age, sex, and race and ethnicity. Analytic *n* are the approximate midpoint from the range of cell sizes over all variables. For pairwise comparisons (across row), cells with common superscripts do not differ significantly (at  $P < .05$ ). Composite risk score based on 14 binary (0,1) indices indicating high-risk status for each row variable in table. [Comment by Author: Theoddsratiosforproblemstatusfor2017YRBSdata\(currentproofTable4\)shouldcomeafterthistable.](#)
